1 EEG suppression of social Pavlovian bias

1

2

3

4 **Alpha EEG power reflects the suppression of Pavlovian bias during**  
5 **social reinforcement learning**

6

7 James C Thompson<sup>1</sup> and Margaret L Westwater<sup>2</sup>

8

9 1. Department of Psychology, George Mason University, Fairfax, VA, USA

10 2. Department of Psychiatry, Addenbrooke's Hospital, University of Cambridge, Cambridge, UK

11

12 Please direct correspondence regarding this manuscript to:

13 Dr. James Thompson

14 Phone: 703-993-9356

15 E-mail: [jthompsz@gmu.edu](mailto:jthompsz@gmu.edu)

16

17 **Running Title:** EEG suppression of social Pavlovian bias

18

19 **Conflict of Interest:** The authors declare no competing financial interests.

1 EEG suppression of social Pavlovian bias

1 Socially appropriate behavior involves learning actions that are valued by others and those that  
2 have a social cost. Facial expressions are one way that others can signal the social value of our  
3 actions. The rewarding or aversive properties of signals such as smiles or frowns also evoke  
4 automatic approach or avoidance behaviors in receivers, and a Pavlovian system learns cues  
5 that predict rewarding or aversive outcomes. In this study, we examined the computational and  
6 neural mechanisms underlying interactions between Pavlovian and Instrumental systems during  
7 social reinforcement learning. We found that Pavlovian biases to approach cues predicting  
8 social reward and avoid cues predicting social punishment interfered with Instrumental learning  
9 from social feedback. While the computations underlying Pavlovian and Instrumental  
10 interactions remained the same as when learning from monetary feedback, Pavlovian biases  
11 from social outcomes to approach or withdraw were not significantly correlated with biases from  
12 money. Trial-by-trial measures of alpha (8-14Hz) EEG power was associated with suppression  
13 of Pavlovian bias to social outcomes, while suppression of bias from money was associated  
14 with theta (4-7Hz) EEG power. Our findings demonstrate how emotional reactions to feedback  
15 from others are balanced with the instrumental value of that feedback to guide social behavior.

16

17 **Significance statement:** A smile from another can be a signal to continue what we are doing,  
18 while an angry scowl is a sure sign to stop. Feedback from others such as this plays an  
19 important role in shaping social behavior. The rewarding nature of a smile (or the aversive  
20 nature of a scowl) can also lead to automatic tendencies to approach (or avoid), and we can  
21 learn situations that predict positive or negative social outcomes. In this study, we examined the  
22 brain mechanisms that come into play when the instrumental demands of a situation are in  
23 conflict with our automatic biases to approach or withdraw, such as when we have to approach

1 EEG suppression of social Pavlovian bias

1 someone who is scowling at us or withdraw from someone who is smiling.

## 1 EEG suppression of social Pavlovian bias

1            Learning socially appropriate behavior requires that we use feedback signals from others  
2 that indicate the value of our actions. Action value can be signaled by other people using facial  
3 expressions, such as a smile or a frown, and we can track social value information from past  
4 actions to help decide how we should act in the present (Frijda, 1986). Reinforcement learning  
5 (RL) approaches have proven useful in describing the action-outcome (Instrumental) learning  
6 process, including aspects of social learning in humans (Apps et al, 2016; Behrens et al., 2009;  
7 Lin et al., 2012; Zaki et al., 2016). At the same time that nonverbal social signals can guide  
8 action learning, the rewarding or aversive properties of these signals can generate affective  
9 responses and automatic behaviors, such as to approach (to a smile) or withdrawal (from a  
10 frown) (Fridja, 1986; Marsh et al., 2005). Responses to such events are controlled by a  
11 Pavlovian motivation system, which facilitates the learning of environmental cues predictive of  
12 reward or punishment, regardless of actions taken in response to such cues (Mackintosh,  
13 1983). While instrumental and Pavlovian motivational systems might work towards the same  
14 goal of maximizing outcomes, these two systems can come into conflict; for example, we may  
15 need to approach someone who looks to be angry with us. Pavlovian-Instrumental (P-I)  
16 interactions have been demonstrated using nonsocial outcomes in humans (Talmi et al., 2008;  
17 Bray et al., 2008; Huys et al., 2011; Prevost et al., 2012; Geurts et al., 2013; Swart et al., 2017)  
18 and nonhuman animals (Rescorla & Solomon, 1967; Berridge, 1996). Balancing interactions  
19 between Instrumental and Pavlovian motivation systems during social behavior is an important  
20 component of self-control (Dayan et al., 2006). In this study we examined the neural and  
21 computational bases of the control of P-I interactions during learning from social feedback, and  
22 compared these to the neural and computational bases of the control of P-I interactions during  
23 learning from nonsocial feedback.

## 1 EEG suppression of social Pavlovian bias

1           Medial and lateral prefrontal cortices (PFC) play a key role in controlling the balance  
2 between conflicting social, emotional, and cognitive demands (Etkin et al., 2006; Zaki et al.,  
3 2010). Oscillatory electro- and magnetoencephalographic (EEG & MEG) activity in the low-to-  
4 mid (1-30Hz) frequency range has been suggested to reflect top-down control (Helfrich &  
5 Knight, 2016; Buschman & Miller, 2014; von Stein & Sarnthein, 2000). Theta (4-7Hz) oscillations  
6 in medial and lateral PFC has been linked to adaptive responses to cognitive conflict and the  
7 need to engage control (Cavanagh & Frank, 2014). Alpha (8-14Hz) and beta (15-30Hz)  
8 oscillations have also been linked to inhibitory control and overriding automatic response  
9 tendencies (Hwang et al., 2014; Jensen and Mazaheri, 2010; Sadaghani & Kleinschmidt, 2016).  
10 Recently, it was shown that frontal theta (4-8Hz) EEG power reflected the trial-by-trial  
11 modulation of Pavlovian biases during instrumental learning based on monetary rewards and  
12 punishments (Cavanagh et al., 2013). Using a Go/No-Go task that orthogonalized action and  
13 outcome valence, combined with a computational model that incorporated Pavlovian and  
14 Instrumental learning, Cavanagh and colleagues (2013) found that greater midfrontal theta  
15 oscillations were associated with the successful suppression of Pavlovian biases during  
16 learning. Less is known about the neural mechanisms that underlie social-emotion control.  
17           Here we examined if learning from social feedback used similar computational and  
18 neural mechanisms to learning from monetary feedback during P-I conflict. We developed a  
19 variant of the Go/No-Go learning task used by Cavanagh and colleagues (2013; Guitart-Masip  
20 et al., 2012) that used happy and angry facial expressions instead of monetary outcomes as  
21 feedback. We compared learning on a social Go/No-Go task to learning on the monetary  
22 Go/No-Go version of the task. EEG was recorded during task performance in order to examine  
23 neural activity associated with conflict between P-I systems. We then used a computational

1 EEG suppression of social Pavlovian bias  
1 model that incorporated Pavlovian and Instrumental learning, based on that developed by  
2 Cavanagh and colleagues (2013), to determine on a trial-by-trial basis the neural mechanisms  
3 underlying the suppression of Pavlovian influence to social and monetary feedback.

4

5

## Materials & Methods

6

### ***Participants***

7

Twenty-two healthy, right-handed adults (15 female;  $M_{age} = 18.6$  y;  $SD = 1.3$ ; 13

8

White/Latino, 5 Asian, 2 African-American, 2 Biracial/Other) with normal or corrected-to-normal

9

vision participated in the study. Participants were recruited as part of a larger study examining

10

social functioning in late adolescence and early adulthood. Two participants were excluded as

11

they were currently received psychological treatment, leaving a final N of 20. Prior to

12

participation, participants provided written informed consent. The study procedure and all

13

relevant materials were approved by the George Mason University Human Subjects Review

14

Board (HSRB). Participants were informed at each session that they were free to withdraw from

15

the study at any time for any reason, and they received monetary compensation (\$15/hr plus

16

winnings from monetary task) for their time.

17

18

### ***Experimental Design and Statistical Analysis***

19

To examine interactions between Pavlovian and instrumental systems during social

20

reinforcement learning, we adapted a Go/No-Go learning task (Figure 1) developed by Guitart-

21

Masip and colleagues (2012). On each trial, participants were presented with one of four cue

22

shapes for 1000ms, followed by variable interval (250-2000ms), and then a white circle (1000ms

23

max) which acted as a response cue. After a 1000ms interval, participants then received

1 EEG suppression of social Pavlovian bias

1 outcomes for 2000ms. On win trials, 80% of correct actions to the response cues were  
2 rewarded and 20% received a neutral outcome, while 20% of incorrect actions were rewarded  
3 and 80% received a neutral outcome. For loss trials, 80% of correct actions received a neutral  
4 outcome and 20% received a punishment, while 80% of incorrect actions received a punishment  
5 and 20% received a neutral outcome. After a variable interval (1000-2000ms), a new trial was  
6 presented. On one half of trials, the correct action was to respond as quickly as possible (Go  
7 trials), and on the other half the correct action was to withhold response (No-Go trials). This  
8 design lead to four conditions, in two of which Pavlovian and Instrumental demands were not in  
9 conflict (Go to Win, No-Go to Avoid Loss), and two of which there was conflict between  
10 Pavlovian and Instrumental (Go to Avoid Less, No-Go to Win). There were 45 trials of each type  
11 for each version (monetary and social) of the task, with trial order randomized. Cue shapes  
12 were drawn from a set of eight shapes, split into a set of four for each task version, and shuffled  
13 across conditions for each participant.

14 In the monetary task, reward was indicated by a green "+ \$", indicating an increase in  
15 funds of 25c, punishment was indicated by a red "- \$", indicating a decrease in funds of 25c, or  
16 a yellow "=", indicated a neutral outcome. In the social task, faces from the NimStim Set of  
17 Facial Expressions (Tottenham et al., 2009) were used as outcomes. Reward was indicated by  
18 a smiling (happy, mouth open) face, punishment was indicated by a frowning (angry) face, and  
19 neutral outcome was indicated by the same yellow "=" used in the monetary task. Eighteen male  
20 faces and eighteen female faces were used, with face identity/sex chosen at random on each  
21 trial. Order of task version presentation was counterbalanced across participants. Participants  
22 were instructed to either respond as quickly as possible to the response cue or to withhold a  
23 response, and that they should explore different actions and learn which response was correct,

1 EEG suppression of social Pavlovian bias

1 given the previous cue shape. The tasks were presented and responses collected using

2 Presentation software. The task paused every 60-90 secs to avoid fatigue and allow the

3 participant to blink and move their eyes.

4

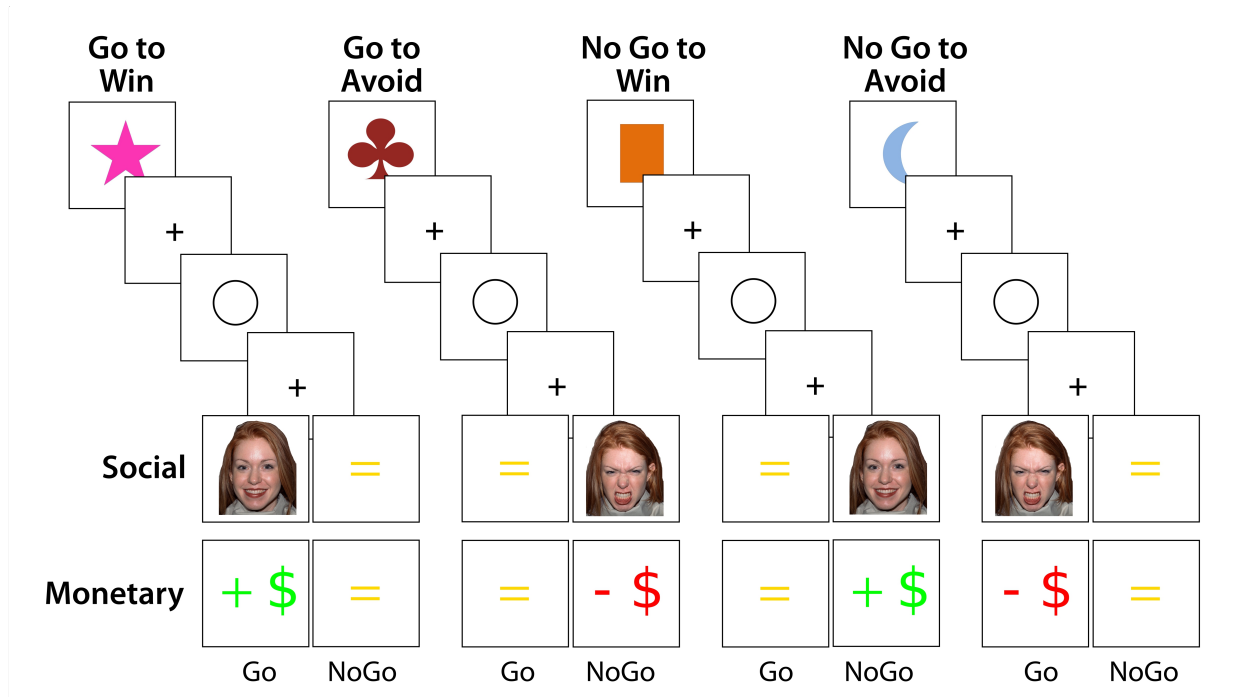

6 **Figure 1. Task Design.** Stimuli and trial design for the Social and Monetary Go/NoGo tasks. Task order

7 was counterbalanced across participants.

8

9 To measure Pavlovian biases across the different conditions within a task, and compare

10 across tasks, we calculated the following measures using the formulae described by Cavanagh

11 and colleagues (2013): Reward Invigoration (RI) was calculated as (Go on Go to Win + No-Go

12 to Win) / Total Go; Punishment Suppression (PS) calculated as (No-Go on Go to Avoid + No-

13 Go to Avoid) / Total No-Go; and Pavlovian Performance Bias (PPB) as the average of RI and



1 EEG suppression of social Pavlovian bias

1 PS. For each of these measures, a bias score of 50% indicates no Pavlovian bias and  
2 performance based only on an instrumental system, whereas a bias score greater than 50%  
3 indicates the presence of Pavlovian bias.

4 Bayesian statistical analysis of behavioral data was performed using the Stan  
5 probabilistic programming language (Carpenter et al., 2016) and the MatlabStan interface (Lau,  
6 2014). Accuracy on the Go/NoGo task was analyzed using a linear mixed effects model with  
7 varying intercept and slopes for action (Go, NoGo), conflict (Conflict, No Conflict), and outcome  
8 (wins, losses). Robust Pearson's correlations with uncertainty in measurement were estimated  
9 using a modification of procedure described by Lee and Wagenmakers (2013). The No-U-Turn  
10 (NUTS) sampler, a variant of Hamiltonian Monte Carlo (HMC) sampling implemented in Stan  
11 was used to estimate posterior distributions. We ran two chains of 2000 samples each,  
12 discarding the first 1000 samples as burn-in. Priors were weakly informative: Gaussian  $N(0,100)$   
13 for means, *Cauchy* (0, 5) for standard deviation (Gelman et al., 2013). For the robust Pearson's  
14 correlation, a multivariate *Student's t* prior was used with an *Exponential*(1/29) hyperprior for the  
15 degrees of freedom. Inferences were based on 95% highest density intervals (HDIs) of posterior  
16 distributions.

17

### 18 ***EEG Recording and Analysis***

19 High-density EEG was recorded from 122 scalp channels and horizontal and vertical  
20 electrooculogram (EOG) channels relative to a vertex reference using an electrocap  
21 (Neuroscan; Compumedics, Abbotsford, Australia). A Synamps2 system (Compumedics) was  
22 used to record data at a sampling rate of 1000 Hz with a bandpass filter of 0.1–100 Hz.  
23 Following data acquisition, the locations of each electrode and the three major fiducial points

1 EEG suppression of social Pavlovian bias

1 (left and right periauricular points and nasion) were digitized using a Polaris optical camera  
2 (Northern Digital, Waterloo, Canada) with Brainsight software (Rogue Research, Montreal,  
3 Canada). Importantly, during digitization a reference was attached to the participant's head so  
4 that head movements would not result in inconsistent measurements.

5 Data were then analyzed using EEGLAB, FieldTrip, and custom Matlab functions. Data  
6 were first epoched around the onset of the shape cue (-1000ms to +1500ms), inspected for bad  
7 channels (range: 0-4 electrodes rejected and interpolated) and epochs with gross artifact to be  
8 rejected (range: 0-6 epochs). Data were referenced to the common average, zero-meaned, and  
9 low pass filtered at 40Hz. Independent Components Analysis (ICA), using the Infomax  
10 algorithm implemented in EEGLAB was then run on the 122 scalp electrodes to identify eye  
11 blinks and movements and muscle artifacts. Semi-Automatic Selection of Independent  
12 Components of the electroencephalogram for Artifact correction (SASICA) (Chaumon et al.,  
13 2015) was used to aid the identification of artifact components. Following ICA, data were  
14 resampled to 250Hz. Time frequency analysis of EEG data from -1000ms to +1500ms relative  
15 to the onset of the shape cue for each condition from three regions of interest (frontocentral, left  
16 posterior, right posterior) was performed in FieldTrip using Morlet wavelets (length = 5 cycles),  
17 with frequencies between 4 and 30Hz in 0.5Hz steps. Trials were averaged and decibel  
18 ( $10 \cdot \log_{10}$ ) power relative to a baseline from -500ms to -200ms before the shape cue onset was  
19 calculated. Band-limited power in theta (4-7Hz), alpha (8-14Hz), and beta (15-30Hz) bands for  
20 each trial was calculated using zero-phase, two-pass Butterworth IIR filters, followed by Hilbert  
21 transformation. Trials were averaged and power in each frequency band was then converted to  
22 percent change from baseline using the baseline period of -500ms to -200ms before the onset  
23 of the shape cue.

## 1 EEG suppression of social Pavlovian bias

1           Analyses of the effects of Pavlovian-Instrumental conflict on EEG power were conducted  
2 by averaging the two conflict conditions (Go to Avoid Loss, No-Go to Win) and the two no-  
3 conflict conditions (Go to Win, No-Go to Avoid Loss), and comparing the two conditions using t-  
4 tests at each time point from the onset of the shape cue to +600ms after onset, at each  
5 electrode and each frequency band. We then examined the relationship between Pavlovian bias  
6 (PPB and model parameters) using Spearman's rank ordered correlation at each time point and  
7 electrode, separately for theta, alpha, and beta frequency bands. We used cluster-based  
8 permutation testing to correct for multiple comparisons, with 2000 permutations, a cluster  
9 forming threshold of  $p < 0.05$ , and a significance threshold of  $p < 0.05$ . For computational  
10 modeling, single trial estimates of shape-cue related EEG power in each band relative to the  
11 pretrial baseline were extracted from the three regions of interest for each condition. Single trial  
12 data were averaged within early (100-300ms) and later (300-500ms) windows. These data were  
13 then z-normalized prior to inclusion in the computational models.

14

### 15           ***Computational Modeling***

16           We used Bayesian hierarchical modeling and stepwise model comparison to examine  
17 the mechanism by which Pavlovian bias influences choice behavior in the Social Go/No-Go and  
18 Monetary Go/No-Go tasks, and to determine the nature of the relations between EEG in the  
19 theta and alpha bands and Pavlovian bias. Separate RL models were fit for the Social Go/No-  
20 Go and Monetary Go/No-Go tasks. We adapted a series of existing computational models of  
21 this task (Guitart-Masip et al., 2012; Cavanagh et al., 2013) to estimate parameters that underlie  
22 Pavlovian-Instrumental interactions during social and monetary RL. Progressively more complex  
23 models were fit to trial-by-trial behavioral data using hierarchical Bayesian model fitting

1 EEG suppression of social Pavlovian bias

1 implemented in Stan (Carpenter et al., 2016), and models were compared by examining if they  
2 explained additional variance (penalized for additional parameters).

3 Performance on the social and monetary Go/No-Go tasks was first modeled as an  
4 Instrumental (Q) learning process with state-action (Q) values updated on a trial-by-trial basis  
5 using a Q-learning algorithm [44]:

6  
7 
$$Q_t(a_t|s_t) = Q_{t-1}(a_t|s_t) + \alpha(r_t - Q_{t-1}(a_t|s_t)) \quad (\text{M1: Q model})$$

8 where reinforcements ( $r$ ) come from the set  $r \in (-1, 01)$  and  $\alpha$  is a free parameter

10 accounting for learning rate, bound between 0 and 1. To account for bias to Go, regardless of  
11 the task conditions, a second model included an additional free parameter ( $b$ ) on Go trials:

12  
13 
$$Q_t(\text{Go}|s_t) = Q_t(\text{Go}|s_t) + b \quad (\text{M2 Q+Go model})$$

14  
15 To model the influence of Pavlovian bias, we modeled the learned value of each stimulus as a  
16 function of reward history:

17  
18 
$$V_t(S_t) = V_{t-1}(S_t) + \alpha(r_t - V_{t-1}(S_t))$$

19  
20 The value of each stimulus was then added to bias the state-action value for Go responses:

21  
22 
$$Q_t(\text{Go}|s_t) = Q_t(\text{Go}|s_t) + b + \pi * V_t(S_t) \quad (\text{M3: Q+Go+Pavlovian model})$$

23  
24  
25 where  $\pi$  is free parameter representing the strength of Pavlovian bias.

26 As in Cavanagh and colleagues (2013), we examined if frontal EEG oscillatory power  
27 reflected the suppression of Pavlovian influences by comparing an additional set of three  
28 models. Each of these models included an effect of EEG power free parameter ( $\rho$ ), that  
29 weighted the contribution of trial-by-trial EEG power (theta, alpha) to the balance between the  
30 Instrumental controller (Q) and the Pavlovian controller (V). As the influence of Pavlovian bias

1 EEG suppression of social Pavlovian bias

1 was expected only on trials in which Pavlovian controller conflicted with the Instrumental  
 2 controller, the contribution of EEG power was only modeled for conflict trials. The first model  
 3 examined if EEG power directly modulates Pavlovian influence:

$$4 \quad Q_t(Go|s_t) = Q_t(Go|s_t) + b + (\rho * EEG + \pi) * V_t(S_t) \quad (M4a: Q+Go+Pavlovian* \\ 5 \quad \text{EEG model})$$

6  
 7 The second model examined if EEG power modulates the influence of the Instrumental (Q)  
 8 system:

$$9 \quad Q_t(Go|s_t) = (1 - \rho * EEG) * Q_t(Go|s_t) + b + \pi * V_t(S_t) \\ 10 \\ 11 \quad Q_t(NoGo|s_t) = (1 - \rho * EEG) * Q_t(NoGo|s_t) \quad (M4b: Q*EEG+Go+ \\ 12 \quad \text{Pavlovian model})$$

13  
 14  
 15 A third model examined if EEG modulates a trade-off between Pavlovian and Instrumental  
 16 systems:

$$17 \quad Q_t(Go|s_t) = (1 - (\omega + \rho * EEG)) * Q_t(Go|s_t) + b + (\omega + \rho * EEG) * V_t(S_t) \\ 18 \\ 19 \quad Q_t(NoGo|s_t) = (1 - (\omega + \rho * EEG)) * Q_t(NoGo|s_t) \quad (M4c: \\ 20 \quad \text{Q/Pavlovian} \\ 21 \quad \text{*EEG model}) \\ 22 \\ 23$$

24 The Q values were used to control the choice probability of action according to a softmax rule:

$$25 \quad p(a|s) = \exp \frac{(Q(a_t|s_t) * \beta)}{\sum \exp(Q(a|s) * \beta)}$$

26  
 27 where  $\beta$  is an “inverse temperature” parameter that reflects the degree to which the  
 28 probability reflects the highest value action. Bayesian hierarchical modeling was used to  
 29 estimate the joint posterior distribution of parameters for the Q model ( $\alpha, \beta$ ), the Q+Go  
 30 model ( $\alpha, \beta, b$ ) the Q+Go+Pavlovian bias model ( $\alpha, \beta, b, \pi$ ), and the three models that  
 31 included trial-by-trial EEG (Q+Go+Pavlovian\*EEG; Q\*EEG+Go+Pavlovian; Q/Pavlovian\*EEG),  
 32 conditional on all participant choices and rewards. The No-U-Turn (NUTS) sampler

1 EEG suppression of social Pavlovian bias  
1 implemented in Stan was used to estimate posterior distributions of parameters. We ran two  
2 chains of 2000 samples each, discarding the first 1000 samples as burn-in. All of the free  
3 parameters were treated as random effects. Models were compared using the Widely-  
4 Applicable Information Criterion (WAIC; Watanabe, 2013). The different behavior-only  
5 computational models were compared to the simplest behavioral model, while different behavior  
6 + EEG computational models were compared to the best fitting behavior-only model. Posterior  
7 predictive model checking was performed by generating one step ahead predictions of action  
8 probabilities for trial  $n$ , based on model parameters and choice/outcome relations for trials 1 to  
9  $(n-1)$ . Action probabilities for each trial for each of the 2000 samples were averaged for each  
10 participant. Separate posterior distributions of parameters were modeled for the social and  
11 monetary tasks. Weakly informative priors were used: priors for parameters with infinite support  
12  $(\beta, b, \pi, \omega, \rho)$  were Gaussian  $N(0, 100)$  for means, *Cauchy*  $(0, 5)$  for standard deviation; for  
13 parameters bound between  $[0, 1]$   $(\alpha)$ , priors were drawn from *Beta*  $(A, B)$  distributions, with  $A$   
14 and  $B$  transformed from  $M=A/(A+B)$  and  $S=1/\sqrt{A+B}$ , with  $M$  drawn from a uniform  
15 distribution  $U(0, 1)$  and  $S$  drawn from uniform distribution  $U(0, \text{Inf})$ .

16

17

## Results

18 The probability of making a Go response was calculated for each condition, separately  
19 for each task. Plots of the average  $p(\text{Go})$  across trials indicate that participants were more likely  
20 to 'go' to the response cue when this response was associated with reward (GTW), and were  
21 less likely to 'go' when the response was associated with a loss (NGTA) (Figure 2A). This  
22 pattern was consistent across the Social and Monetary tasks. To facilitate a direct comparison  
23 of performance across conditions, we used  $p(\text{Go})$  as a measure of correct response for the Go

1 EEG suppression of social Pavlovian bias

1 trials, and 1-p(Go) for correct response for the No-Go trials (Figure 2B). Across both tasks,  
 2 accuracy performance was consistent with an influence of Pavlovian bias. Accuracy was higher  
 3 in the conditions in which there was no Pavlovian-Instrumental conflict (Go to Win, No-Go to  
 4 Avoid) than in the conditions in which there was conflict (Go to Avoid, No-Go to Win), for both  
 5 the Social task (posterior mean slope = 10.72 [4.17, 17.52]) and the Monetary task (posterior  
 6 mean slope = 11.33 [0.11, 21.93]).

7

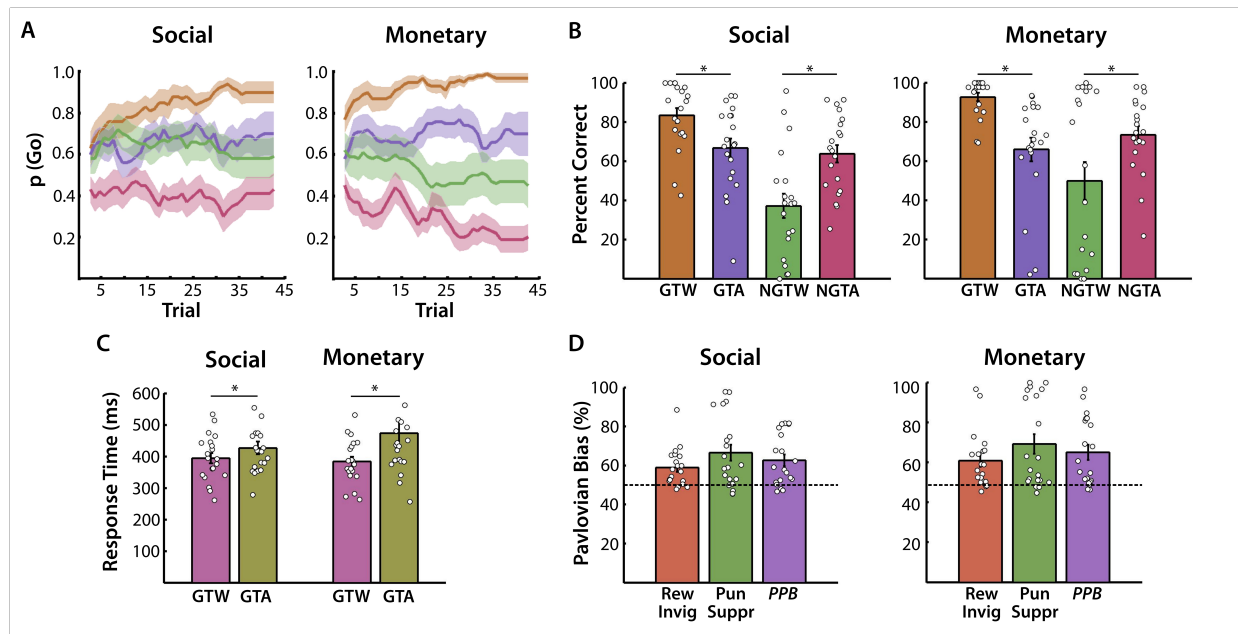

9 **Figure 2.** Behavioral results from the Social and Monetary Go/NoGo tasks. **A.** Trial-by-trial average (+/  
 10 s.e.) probability of making a 'go' response to the response cue (5 trial moving average). Burnt orange is  
 11 Go to Win (GTW), dark lilac is Go to Avoid (GTA), mantis green is NoGo to Win (NGTW), and dark terra  
 12 cotta NoGo to Avoid (NGTA). **B.** Average (+/- s.e.) and individual participant percent correct responses  
 13 (p(Go) for Go trials, 1-p(Go) for NoGo trials). **C.** Average (+/- s.e.) and individual participant reaction  
 14 times for 'go' responses for GTW and GTA trials. **D.** Average (+/- s.e.) and individual participant

## 1 EEG suppression of social Pavlovian bias

1 measures of Pavlovian bias (Rew Invig = reward invigoration; Pun Suppr = Punishment Suppression;  
2 PPB = Pavlovian Performance Bias). Colorblind friendly palettes were created using Iwanthue  
3 (<http://tools.medialab.sciences-po.fr/iwanthue/>) and k-means clustering.

4

5 Accuracy was higher in the Go trials than in the No-Go trials for the Social task (posterior  
6 mean slope = 12.46 [2.5, 19.00]), but not the Monetary task (posterior mean slope = 9.07 [-2.36,  
7 20.64]). Overall, accuracy was not higher for wins than in losses for either the Social task  
8 (posterior mean slope = -2.50 [-7.68, 3.04]) and the Monetary task (posterior mean slope = 1.13  
9 [-7.48, 11.19]). In further support of the presence of Pavlovian bias influencing performance, we  
10 observed that (log transformed) reaction times (RT) for Go trials with no conflict (Go to Win)  
11 were faster than Go trials with conflict (Go to Avoid) for both the Social task (posterior mean  
12 difference = -0.08 [-0.14, -0.01]) and the Monetary task (posterior mean difference = -0.16 [-  
13 0.31, -0.02]) (Figure 2C).

14 To quantify Pavlovian influence on choice on the two tasks, we calculated indices of  
15 Reward Invigoration (RI), Punishment Suppression (PS), and overall Pavlovian Performance  
16 Bias (PPB). For each of these measures, a bias score of 50% indicates no Pavlovian bias and  
17 performance based only on an instrumental system, whereas a bias score greater than 50%  
18 indicates the presence of Pavlovian bias. The posterior 95% HDIs of the means for the three  
19 indices were greater than 50% for the Social task (RI = [54.38, 62.67]; PS = [57.74, 74.45]; PPB  
20 = [56.68, 68.15]) and the Monetary task (RI = [54.26, 66.91]; PS = [57.45, 78.31]; PPB = [56.59,  
21 76.02]) (Figure 2D). The pattern of accuracy and PPB observed on the Social and Monetary  
22 Go/No-Go tasks used in the present study were qualitatively similar to previous studies  
23 employing versions of the Monetary task (Cavanagh et al., 2013; Guitart-Masip et al., 2012). As  
24 was the case with these studies, there was considerable variability in the extent to which



1 EEG suppression of social Pavlovian bias

1 Pavlovian biases influenced performance, especially in the No-Go to Win conditions (Figure  
2 2B). We examined if the Pavlovian bias observed on both the Social and Monetary tasks  
3 reflected a common learning mechanism, regardless of the properties of the outcome, by  
4 examining if individual differences in Pavlovian Bias across was correlated across Social and  
5 Monetary tasks. Results indicated that RI (posterior mean  $r = 0.24$  [-0.49, 0.87]), PS (posterior  
6 mean  $r = 0.08$  [-0.91, 0.93]), and PPB (posterior mean  $r = 0.13$  [-0.79, 0.88]) were not reliably  
7 correlated across the Social and Monetary tasks, indicating that those participants who were  
8 most influenced by social outcomes were not similarly affected by monetary outcomes (and vice  
9 versa).

10

## 11 **EEG**

12 We first examined if Pavlovian-Instrumental conflict during Social or Monetary  
13 reinforcement learning was associated with changes to EEG power by comparing conditions  
14 with Conflict (GTA and NGTW) to conditions with No Conflict (GTW and NGTA), averaged  
15 across all trials in each condition. We examined EEG power locked to the onset of the abstract  
16 shapes that had no initial value prior to the start of the task (Figure 3A). It should be noted that  
17 the association with a motor response and the valence of outcome was balanced across Conflict  
18 and No Conflict conditions. No significant differences in EEG power between Conflict and No  
19 Conflict conditions were observed in either the Social Go/No-Go task or the Monetary Go/No-Go  
20 task. To examine the relationship between Pavlovian biases in behavior and conflict-related  
21 changes in EEG power, we correlated behavioral performance with conflict-specific (Conflict –  
22 No Conflict) EEG responses in the theta, alpha, and beta frequency bands for the Social and  
23 Monetary Go/No-Go tasks.

1 EEG suppression of social Pavlovian bias

1

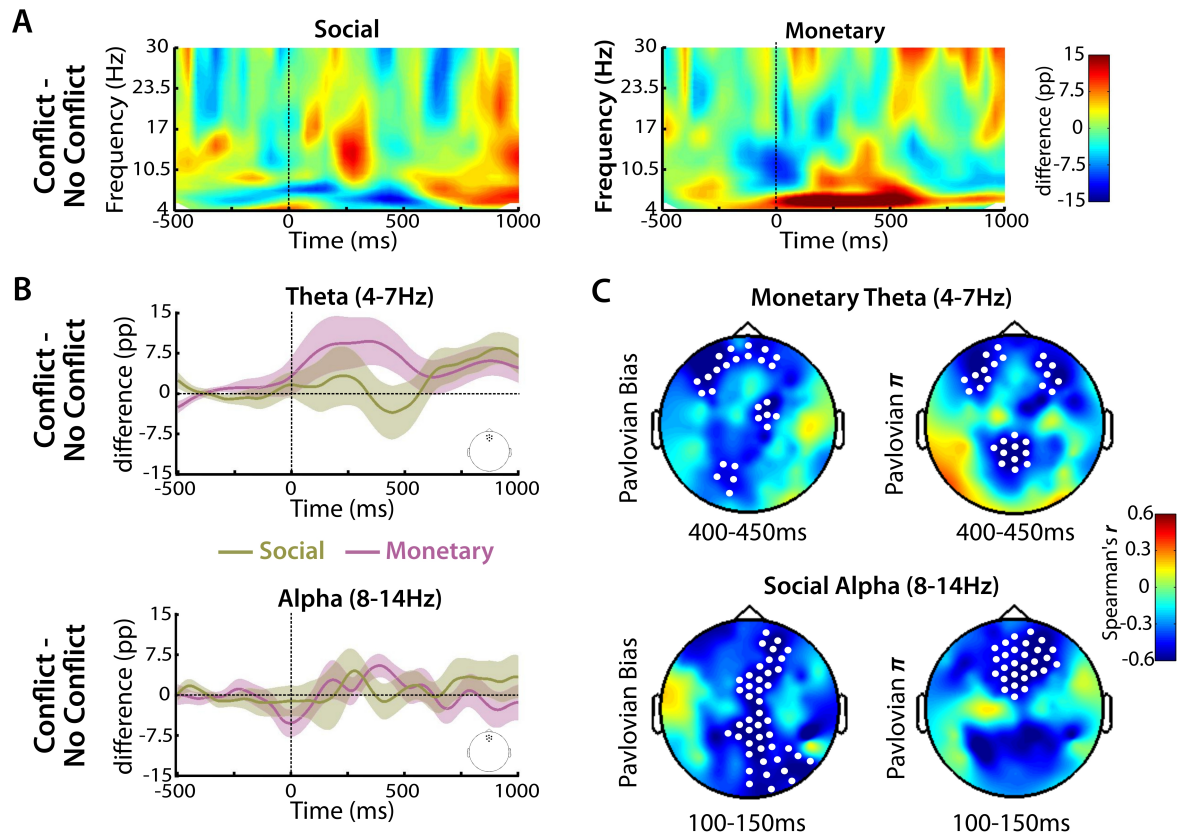

3 **Figure 3.** EEG Data Time Locked to Onset of the Shape Cue. A. Time-frequency plots of the average  
4 difference between Pavlovian Conflict (GTA, NGTW) and No Conflict (GTW, NGTA) from frontocentral ROI  
5 (pp = percentage points). B. Average (+/-) difference in bandpass filtered power in theta and alpha bands  
6 between Conflict and No Conflict conditions from frontocentral ROI. C. Maps of the correlation (Spearman's  $r$ )  
7 between Pavlovian bias and EEG power (Conflict - No Conflict). Top row shows correlation maps (and  
8 electrode sites within significant clusters) between Pavlovian Performance Bias and theta power (left), and  
9 model-based Pavlovian bias parameter  $\pi$  and theta power (right), from the Monetary task. Bottom row shows  
10 correlation maps (and electrode sites within significant clusters) between Pavlovian Performance Bias and

1 EEG suppression of social Pavlovian bias

1 alpha power (left), and model-based Pavlovian bias parameter  $\pi$  and alpha power (right), from the Social  
2 task.

3

4 A previous study reported significant negative correlation between conflict-specific frontocentral

5 theta EEG power and the behavioral PPB measure from a monetary Go/No-Go task (Cavanagh

6 et al., 2013). We found significant negative correlation between conflict-specific theta EEG

7 power and the PPB measure in the Monetary Go/No-Go task in frontal and parietal sites

8 (cluster: 200-528ms;  $p=0.002$  corrected) (Figure 3C). This is later than the timing of the

9 correlation reported by Cavanagh and colleagues (2003) of 175-350ms, but consistent with the

10 timing of conflict-related activity in the theta band reported elsewhere (Cohen & Donner, 2013).

11 This correlation was restricted to the theta band and no significant correlation between PPB and

12 alpha power was observed for the Monetary Go/No-Go task. In contrast to the findings from the

13 Monetary Go/No-Go task, no significant correlation between PPB and conflict-specific theta was

14 observed for the Social Go/No-Go task. Instead, a significant negative correlation with PPB was

15 observed in the alpha band over frontal and posterior sites (cluster: 20-268ms;  $p=0.005$

16 corrected) (Figure 3C). No significant correlations between PPB from either the Social Go/No-

17 Go task or the Monetary Go/No-Go task were observed in the beta frequency band.

18

### 19 ***Computational Modeling***

20 Beginning first with behavior-only RL models, we observed that relative to a Q-learning

21 (M1) and the Q-learning+Go (M2) models, including a Pavlovian bias parameter ( $\pi$ ) increased

22 model fit (i.e. decreased WAIC relative to the Q model) of M3 considerably for both the Social

23 Go/No-Go task and the Monetary Go/No-Go task (Table 1). To examine the relationship

1 EEG suppression of social Pavlovian bias

1 between model estimates of Pavlovian bias and EEG activity, we correlated the model

2 parameter  $\pi$  and EEG power in the theta and alpha frequency bands for the Social Go/No-Go

3 and Monetary Go/No-Go tasks. We observed significant negative correlation between  $\pi$  and

4 alpha power for the Social Go/No-Go task over frontal sites (cluster: 64-280ms;  $p=0.007$

5 corrected), and between  $\pi$  and theta power for the Monetary Go/No-Go task over frontal sites

6 (cluster: 200-528ms;  $p=0.02$  corrected) (Figure 3C). These effects indicate that individuals with

7 greater level of theta power (for Monetary Go/No-Go) or alpha power (for Social Go/No-Go)

8 show less Pavlovian bias during learning, however these results do not reveal the mechanism

9 underlying trial-by-trial interactions between Pavlovian and Instrumental systems. To examine

10 trial-by-trial effects, we compared three models in which EEG power in either the theta or alpha

11 band modulated the Pavlovian influence directly (M4a:  $Q+Go+Pavlovian*EEG$ ), modulated the

12 Instrumental influence (M4b:  $Q*EEG+Go+Pavlovian$ ), or modulated the trade-off between

13 Pavlovian and Instrumental influences (M4c:  $Q/Pavlovian*EEG + Go$ ).

14 Results indicated that for the Social Go/No-Go task, the winning model (M4a) was one in

15 which the influence of the Pavlovian system was modulated on a trial-by-trial basis by frontal alpha

16 EEG power from a 100-300ms window after shape onset (Table 1). For the Monetary Go/No-Go

17 task, results indicated that instead the winning model (M4a) was one in which the influence of the

18 Pavlovian system was modulated on a trial-by-trial basis by frontal theta EEG power in a 300-

19 500ms window after shape onset (Table 1).

20

## 1 EEG suppression of social Pavlovian bias

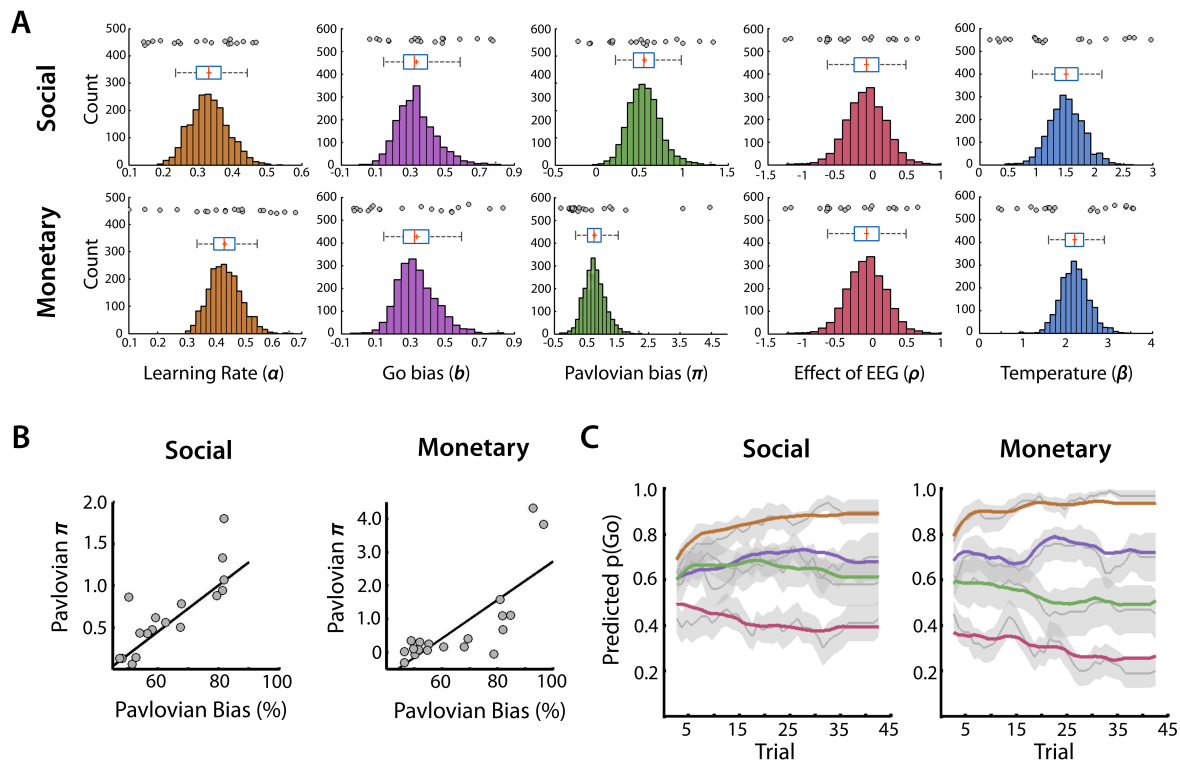

1 **Figure 4.** Posterior Estimates of Model Parameters and Posterior Predictive Checks. A. Posterior  
2 distributions of model parameters from the M4a model from the Social (top row) and Monetary (bottom row)  
3 tasks. Histograms and box and whisker plots represent posterior distribution of HMC samples ( $n = 2000$ ) of  
4 the group-level parameters. Box indicates posterior interquartile range (red line = median, red cross = mean),  
5 whiskers indicate 95% HDI. Circles indicate posterior means for participant-level parameters for each  
6 participant. B. Scatterplots and least squares line of Pavlovian Performance Bias (x axis) and model-based  
7 Pavlovian parameter  $\pi$  (y axis) from Social (left) and Monetary (right) tasks. C. Average trial-by-trial one step  
8 ahead predictions (5 trial moving average) of the probability of a 'go' response from the four conditions of the  
9 Social (left) and Monetary (right) tasks. Colors of conditions are the same as in Figure 2A. Grey lines  
10 represent average (+/- s.e) of participants' probability of 'go' response.  
11  
12 These effects showed some level of frequency-dependency, as models that used theta EEG power

1 EEG suppression of social Pavlovian bias  
 1 to modulate Pavlovian bias were a poor fit for data from the Social Go/No-Go task, whereas  
 2 models using alpha EEG power to modulate Pavlovian bias were a poor fit for data from the  
 3 Monetary Go/No-Go task. Posterior distributions (including posterior mean and 95% Highest  
 4 Density Intervals) of the group-level parameters, and plots of posterior means of individual-level  
 5 parameter estimates, of the winning model for the Social and Monetary Go/No-Go tasks are  
 6 presented in Figure 4A.

7

8 **Table 1. Widely Applicable Information Criterion (WAIC) for the different computational**  
 9 **models from the Social and Monetary tasks.**

|                                        | <b>Social</b> | <b>Monetary</b> |
|----------------------------------------|---------------|-----------------|
| <b>Model</b>                           | <b>WAIC</b>   | <b>WAIC</b>     |
| <b>M1: Q</b>                           | 4092          | 3525            |
| <b>M2: Q + Go</b>                      | 3661          | 3014            |
| <b>M3: Q + Go + Pav</b>                | 3373          | 2747            |
| <b>M4a: Q + Go + Pav * EEG (alpha)</b> | <b>3358</b>   | 2714            |
| <b>M4a: Q + Go + Pav * EEG (theta)</b> | 3371          | <b>2697</b>     |
| <b>M4b: Q * EEG + Go + Pav (alpha)</b> | 3364          |                 |
| <b>M4c: Q/Pav * EEG + Go (alpha)</b>   | 3366          |                 |
| <b>M4b: Q * EEG + Go + Pav (theta)</b> |               | 2938            |
| <b>M4c: Q/Pav * EEG + Go (theta)</b>   |               | 2747            |

10

11 As a posterior predictive check, the posterior mean of the Pavlovian model parameter  $\pi$   
 12 was calculated for each participant and correlated with PPB for the Social Go/No-Go task and the  
 13 Monetary Go/No-Go task (Figure 4B). Results indicated that the model parameter  $\pi$  was correlated

1 EEG suppression of social Pavlovian bias  
1 with PPB for both the Social Go/No-Go (posterior mean  $r = 0.77$  [0.40, 0.98]) and Monetary Go/No-  
2 Go (posterior mean  $r = 0.74$  [0.45, 0.96]) tasks. There were two outliers in the distribution of  $\pi$  from  
3 the Monetary Go/No-Go task; while the robust Pearson correlation is generally robust to such  
4 outliers, we repeated the correlation after removing the two outliers and found only minimal change  
5 to the correlation (posterior mean  $r = 0.73$  [.37, 0.99]). We also generated one step ahead  
6 predictions of choice for trial  $t_n$  for each participant, from the trial-by-trial combination at trials  $t_1$  to  $t_n$ .  
7  $t_1$  of model estimates, behavioral choice/outcomes, and EEG data (Figure 4C). These predictions  
8 capture key features of the behavioral data, including an increased probability to Go over NoGo  
9 responses, and Pavlovian bias, for both the Social Go/NoGo and the Monetary Go/NoGo tasks.

10

11

## Discussion

12 Nonverbal social signals can shape our behavior by providing a signal of the value of our  
13 actions to another: a friendly smile can encourage us to continue, while an angry scowl can stop  
14 us in our tracks (Fridja, 1986; Van Kleef, 2009). Expressions of emotions in other people,  
15 conveyed through facial expressions, can also generate affective responses and elicit  
16 associated automatic approach or avoidance behaviors from an observer (Marsh et al., 2005;  
17 Seidel et al., 2010). It can therefore be useful to learn what cues predict the expression of  
18 emotions in others. At times, the automatic responses to reward or punishment (and/or the cues  
19 that predict these outcomes), and the instrumental demands of a social interaction, can come  
20 into conflict. In this study, we adapted a computational model that proposes distinct motivation  
21 systems for action-value (Instrumental) learning and Pavlovian learning of stimulus-outcome  
22 associations (Dayan et al, 2006), to examine reinforcement learning from social feedback from  
23 others. We found that conflict between Pavlovian and Instrumental demands can impair learning

1 EEG suppression of social Pavlovian bias

1 accuracy and response times when learning cue-action relations based on social feedback.

2 Moreover, the adverse effects of Pavlovian-Instrumental conflict were due to the trial-by-trial

3 contribution of Pavlovian biases to approach social reward or withdrawal from social

4 punishment. The interactions between Pavlovian and Instrumental systems during social

5 reinforcement learning were computationally very similar to those observed during

6 reinforcement learning from monetary outcomes, although we observed that across participants

7 the Pavlovian bias for social outcomes was not correlated with Pavlovian bias for monetary

8 outcomes. We also observed distinct brain oscillatory mechanisms underlying the control of

9 social and monetary outcome biases.

10 Controlling responses to social feedback is important for adapting behavior to different

11 social contexts. While feedback from others can come in the form of verbal or physical cues,

12 signaling the value of behavior through an emotional facial expression can be a quick, and often

13 effective, means of communicating whether a behavior is socially appropriate or not (Niedenthal

14 & Brauer, 2012; Van Kleef, 2009). Defining the control of socially-based emotions in

15 computational terms is important for a detailed understanding of this phenomenon, including

16 understanding individual differences and the circumstances in which emotion control breaks

17 down (Etkin et al., 2016; Raio et al., 2016). The interaction between Pavlovian and Instrumental

18 motivation systems described in the present study represents only one way in which motivation

19 systems might coordinate and control behavior. The computational approach we used

20 represents both Pavlovian and Instrumental systems each as model-free, assigning values to

21 stimuli and actions based on the outcome history rather than any explicit, causal representation

22 of the world (Doll et al., 2012; O'Doherty et al., 2017). This is likely an oversimplification, as

23 model-based strategies play an important role in controlling behavior including learning from



1 EEG suppression of social Pavlovian bias

1 social feedback (Doll et al., 2012; Dayan & Berridge, 2014). Interestingly, a recent study  
2 indicated that the strength of model-based learning in a reinforcement learning task was  
3 negatively correlated with the strength of Pavlovian to Instrumental transfer, in tasks using  
4 monetary outcomes (Sebold et al., 2016). These findings suggest that model-based  
5 Instrumental learning and the control of Pavlovian biases might share a common basis.

6 We observed that successful neural control of the Pavlovian system during learning from  
7 social feedback was associated with increased oscillatory EEG activity in the alpha (8-14Hz)  
8 frequency range, particularly over frontal sites. A brief increase in frontal alpha EEG power in  
9 the first 100-300ms after the onset of a predictive cue was associated on a trial-by-trial basis  
10 with the suppression of Pavlovian bias, and, across participants, the extent of Pavlovian  
11 influence on behavior was associated with increases in alpha power to cues associated with P-I  
12 conflict in this same time window. This study is the first to describe in computational terms the  
13 neural basis of the control of Pavlovian bias during Instrumental learning from social feedback.  
14 We also observed that learning from monetary feedback involved similar computational  
15 processes to learning from social feedback, but theta (4-7Hz) activity was involved for the  
16 control of Pavlovian bias to monetary feedback. Successful suppression of Pavlovian bias was  
17 associated with an increase in frontal theta EEG activity in a time window later than that for the  
18 social task. The results from the monetary task are largely consistent with a previous report  
19 using a very similar task by Cavanagh and colleagues (2013), although these authors found  
20 frontal theta-based suppression of Pavlovian bias following monetary feedback in an earlier time  
21 window (175-350ms) to that observed for the monetary feedback in the present study.

22 Dynamic oscillatory EEG and MEG responses likely reflect the integration of local circuit  
23 activity with large-scale coordinated activity across networks of regions, rather than the

1 EEG suppression of social Pavlovian bias

1 response of any one brain region alone (Freeman, 1975; Fries, 2015; Nunez, 2000). We  
2 observed that midfrontal alpha and theta played very similar roles in the suppression of  
3 Pavlovian bias during social and monetary reinforcement learning, respectively, albeit with  
4 distinct time courses. Two explanations for these findings seem likely: first, the frequency-  
5 dependent effects we observed could reflect two quite distinct neural networks. Midfrontal theta  
6 has long been associated with the engagement of cognitive control, and appears to reflect the  
7 activity of a network included medial PFC, dorsal anterior cingulate cortex, and basal ganglia  
8 (Cavanagh & Frank, 2013). The sources and role of alpha oscillations have been subject to  
9 considerably more debate. One hypothesis is that alpha power reflects the engagement of  
10 active inhibition of task- or goal-irrelevant representations (Klimesch et al., 2007; Jensen and  
11 Mazaheri, 2010; Bollimunta et al., 2011; Sadaghani & Kleinschmidt, 2016). For example, the  
12 pulsed inhibition theory of cortical alpha proposes that pulses of top-down inhibition at  
13 approximately every 100ms act to suppress task-irrelevant representations in sensory and  
14 motor cortex (Klimesch et al., 2007; Haegens et al., 2014). It is possible that the network  
15 associated with suppression of biases to approach social reward-predicting stimuli and  
16 withdrawal from social punishment-predicting stimuli during learning is engaged early and  
17 consists of alpha-frequency pulses of inhibition from frontal regions to sensorimotor  
18 representations, distinct from a frontostriatal network involved in suppression of Pavlovian bias  
19 associated with monetary outcomes.

20 An alternative explanation for the present findings is that a largely overlapping network is  
21 recruited for the suppression of Pavlovian biases associated with social and monetary  
22 outcomes. This network might recruit distinct subregions for the control of behaviors associated  
23 with different classes of outcomes, with brain regions preferentially involved in the determining

1 EEG suppression of social Pavlovian bias

1 the social importance of environmental cues, including in medial prefrontal and lateral temporal  
2 cortices, engaged during the social task. Recruitment of distinct brain regions into a network  
3 might be expected to shift the dominant oscillatory rhythm of that network, either because of the  
4 intrinsic temporal properties of those regions or through reconfiguration of longer-range  
5 connections throughout the network (including shortening or lengthening of paths) (Freeman,  
6 1975; Nunez, 2000). In addition, the early timing of the alpha frequency-based Pavlovian  
7 suppression mechanism could reflect a greater priority given for primary (e.g., social)  
8 reinforcers relative to secondary reinforcers (e.g., money) (Anderson, 2016; Kringelbach &  
9 Rolls, 2003).

10 Together, our findings suggest a computational mechanism through which the emotional  
11 responses to social signals from other people are balanced with the instrumental value that  
12 those signals provide. While this mechanism shares similarities with that used to suppress  
13 biases associated with other forms of reward, the control of Pavlovian bias from social  
14 outcomes was associated with a distinct basis in brain oscillatory activity. These results provide  
15 details of how controlling how we feel in response to the feedback from others can be important  
16 for learning behaviors appropriate for social contexts, and show how tracking the dynamics of  
17 brain activity, combined with computational modeling, can reveal how such control is  
18 implemented.

19

20

1 EEG suppression of social Pavlovian bias

1 **References**

2

3 Anderson BA. (2016). Social reward shapes attentional biases. *Cogn Neurosci*. 7:30-6.

4

5 Apps MA, Rushworth MF, Chang SW. (2016). The Anterior Cingulate Gyrus and Social  
6 Cognition: Tracking the Motivation of Others. *Neuron*. 90:692-707.

7

8 Behrens TE, Hunt LT, Rushworth MF. (2009). The computation of social behavior. *Science*.  
9 324:1160-4.

10

11 Berridge KC. (1996). Food reward: brain substrates of wanting and liking. *Neurosci Biobehav*  
12 *Rev*. 20:1-25.

13

14 Bollimunta A, Mo J, Schroeder CE, Ding M. (2011) Neuronal mechanisms and attentional  
15 modulation of corticothalamic  $\alpha$  oscillations. *J Neurosci*. 31:4935-43.

16

17 Bray S, Rangel A, Shimojo S, Balleine B, O'Doherty JP. (2008). The neural mechanisms  
18 underlying the influence of pavlovian cues on human decision making. *J Neurosci*. 28:5861-6.

19

20 Buschman TJ, Miller EK. (2014). Goal-direction and top-down control. *Philos Trans R Soc Lond*  
21 *B Biol Sci*. 369: 20130471.

22

23 Carpenter, B, Gelman, A, Hoffman, M, Lee, D, Goodrich, B, Betancourt, M, Brubaker, MA, Guo,  
24 J, Li, P, Riddell, A. (2017). Stan: A probabilistic programming language. *Journal of Statistical*  
25 *Software*, 76 (1):1-32.

26

27 Cavanagh, JF, Eisenberg, I, Guitart-Masip, M, Huys, Q, Frank, MJ. (2013). Frontal theta  
28 overrides pavlovian learning biases. *Journal of Neuroscience*. 33(19):8541-8

29

30 Cavanagh JF, Frank MJ. (2014) Frontal theta as a mechanism for cognitive control. *Trends*  
31 *Cogn Sci*. 18:414-21.

1 EEG suppression of social Pavlovian bias

1

2 Chaumon M, Bishop DV, Busch NA. (2015). A practical guide to the selection of independent  
3 components of the electroencephalogram for artifact correction. *J Neurosci Methods*. 250:47-63.

4

5 Cohen MX, Donner TH. (2013). Midfrontal conflict-related theta-band power reflects neural  
6 oscillations that predict behavior. *J Neurophysiol*. 110:2752-63.

7

8 Dayan P, Berridge KC. (2014). Model-based and model-free Pavlovian reward learning:  
9 revaluation, revision, and revelation. *Cogn Affect Behav Neurosci*. 14:473-92.

10

11 Dayan, P, Niv, Y, Seymour, B, Daw, ND. (2006). The misbehavior of value and the discipline of  
12 the will. *Neural Networks*. 19(8):1153-60.

13

14 Doll BB, Simon DA, Daw ND. (2012). The ubiquity of model-based reinforcement learning. *Curr*  
15 *Opin Neurobiol*. 22:1075-81.

16

17 Etkin A, Büchel C, Gross JJ. (2015). The neural bases of emotion regulation. *Nat Rev Neurosci*.  
18 16:693-700.

19

20 Etkin A, Egner T, Peraza DM, Kandel ER, Hirsch J. (2006). Resolving emotional conflict: a role  
21 for the rostral anterior cingulate cortex in modulating activity in the amygdala. *Neuron*. 51:871-  
22 82.

23

24 Fries P. (2015). Rhythms for Cognition: Communication through Coherence. *Neuron*. 88:220-  
25 35.

26

27 Frijda, NH. (1986). *The emotions*. Cambridge, UK: Cambridge University Press.

28

29 Gelman A, Carlin JB, Stern HS, Dunson DB, Vehtari A, Rubin DB (2013). *Bayesian Data*  
30 *Analysis, Third Edition*. Chapman Hall, Boca Raton, FL.

31

1 EEG suppression of social Pavlovian bias

1 Geurts DE, Huys QJ, den Ouden HE, Cools R. (2013). Aversive Pavlovian control of  
2 instrumental behavior in humans. *J Cogn Neurosci*. 25:1428-41.

3  
4 Guitart-Masip, M, Huys, QJ, Fuentemilla, L, Dayan, P, Duzel, E, Dolan, RJ. (2012). Go and no-  
5 go learning in reward and punishment: interactions between affect and effect. *Neuroimage*.  
6 62(1):154-66.

7  
8 Haegens S, Vázquez Y, Zainos A, Alvarez M, Jensen O, Romo R. (2014). Thalamocortical  
9 rhythms during a vibrotactile detection task. *Proc Natl Acad Sci U S A*. 111:E1797-805.

10  
11 Helfrich RF, Knight RT. (2016). Oscillatory Dynamics of Prefrontal Cognitive Control. *Trends*  
12 *Cogn Sci*. 20:916-930.

13  
14 Huys QJ, Cools R, Gölzer M, Friedel E, Heinz A, Dolan RJ, Dayan P. (2011). Disentangling the  
15 roles of approach, activation and valence in instrumental and pavlovian responding. *PLoS*  
16 *Comput Biol*. 7:e1002028.

17  
18 Hwang K, Ghuman AS, Manoach DS, Jones SR, Luna B. (2014). Cortical neurodynamics of  
19 inhibitory control. *J Neurosci*. 34:9551-61.

20  
21 Jensen O, Mazaheri A. (2010). Shaping functional architecture by oscillatory alpha activity:  
22 gating by inhibition. *Front Hum Neurosci*. 4:186.

23  
24 Klimesch W, Sauseng P, Hanslmayr S, Gruber W, Freunberger R. (2007). Event-related phase  
25 reorganization may explain evoked neural dynamics. *Neurosci Biobehav Rev*. 31:1003-16.

26  
27 Kringelbach ML, Rolls ET. (2003). Neural correlates of rapid reversal learning in a simple model  
28 of human social interaction. *Neuroimage*. 20:1371-83.

29  
30 Lee and Wagenmakers (2013) Bayesian Cognitive Modeling: A Practical Course Lee MD,  
31 Wagenmakers E-J. Cambridge: Cambridge University Press

1 EEG suppression of social Pavlovian bias

1

2 Lin A, Adolphs R, Rangel A. (2012). Social and monetary reward learning engage overlapping  
3 neural substrates. *Soc Cogn Affect Neurosci.* 7:274-81.

4

5 Mackintosh, NJ. (1983). *Conditioning and Associative Learning*. Oxford, UK: Oxford University  
6 Press.

7

8 Marsh AA, Ambady N, Kleck RE. (2005). The effects of fear and anger facial expressions on  
9 approach- and avoidance-related behaviors. *Emotion.* 5:119-24.

10

11 Niedenthal PM, Brauer M. (2012). Social functionality of human emotion. *Annu Rev Psychol.*  
12 2012;63:259-85.

13

14 Nunez PL, Wingeier BM, Silberstein RB. (2001). Spatial-temporal structures of human alpha  
15 rhythms: theory, microcurrent sources, multiscale measurements, and global binding of local  
16 networks. *Hum Brain Mapp.* 13:125-64.

17

18 O'Doherty JP, Cockburn J, Pauli WM. (2017). Learning, Reward, and Decision Making. *Annu*  
19 *Rev Psychol.* 68:73-100.

20

21 Prévost C, Liljeholm M, Tyszka JM, O'Doherty JP. (2012). Neural correlates of specific and  
22 general Pavlovian-to-Instrumental Transfer within human amygdalar subregions: a high-  
23 resolution fMRI study. *J Neurosci.* 32:8383-90.

24

25 Raio CM, Goldfarb EV, Lempert KM, Sokol-Hessner P. (2016). Classifying emotion regulation  
26 strategies. *Nat Rev Neurosci.* 17:532.

27

28 Rescorla RA, Solomon RL. (1967). Two-process learning theory: Relationships between  
29 Pavlovian conditioning and instrumental learning. *Psychol Rev.* 74:151-82.

30

31 Sadaghiani S, Kleinschmidt A. (2016). Brain Networks and  $\alpha$ -Oscillations: Structural and

1 EEG suppression of social Pavlovian bias

1 Functional Foundations of Cognitive Control. *Trends Cogn Sci.* 20:805-817.

2

3 Sebold M, Schad DJ, Nebe S, Garbusow M, Jünger E, Kroemer NB, Kathmann N, Zimmermann  
4 US, Smolka MN, Rapp MA, Heinz A, Huys QJ. (2016). Don't Think, Just Feel the Music:  
5 Individuals with Strong Pavlovian-to-Instrumental Transfer Effects Rely Less on Model-based  
6 Reinforcement Learning. *J Cogn Neurosci.* 28:985-95.

7

8 Seidel EM, Habel U, Kirschner M, Gur RC, Derntl B. (2010). The impact of facial emotional  
9 expressions on behavioral tendencies in women and men. *J Exp Psychol Hum Percept Perform.*  
10 36:500-7.

11

12 Swart JC, Froböse MI, Cook JL, Geurts DE, Frank MJ, Cools R, den Ouden HE. (2017).  
13 Catecholaminergic challenge uncovers distinct Pavlovian and instrumental mechanisms of  
14 motivated (in)action. *Elife.* 6. pii: e22169.

15

16 Talmi D, Seymour B, Dayan P, Dolan RJ. (2008). Human pavlovian-instrumental transfer. *J*  
17 *Neurosci.* 28:360-8.

18

19 Tottenham N, Tanaka JW, Leon AC, McCarry T, Nurse M, Hare TA, Marcus DJ, Westerlund A,  
20 Casey BJ, Nelson C. (2009). The NimStim set of facial expressions: judgments from untrained  
21 research participants. *Psychiatry Res.* 168:242-9.

22

23 von Stein A, Sarnthein J. (2000). Different frequencies for different scales of cortical integration:  
24 from local gamma to long range alpha/theta synchronization. *Int J Psychophysiol.* 38:301-13.

25

26 Watanabe S. (2013). A Widely Applicable Bayesian Information Criterion. *Journal of Machine*  
27 *Learning Research* 14:867-897.

28

29 Zaki J, Kallman S, Wimmer GE, Ochsner K, Shohamy D. (2016). Social Cognition as  
30 Reinforcement Learning: Feedback Modulates Emotion Inference. *J Cogn Neurosci.* 28:1270-  
31 82.



1 EEG suppression of social Pavlovian bias

1

2 Zaki J, Hennigan K, Weber J, Ochsner KN. (2010). Social cognitive conflict resolution:

3 contributions of domain-general and domain-specific neural systems. J Neurosci. 30:8481-8.
